# Supplementary material for: Secondary metabolites with antimicrobial activity produced by thermophilic bacteria from a high-altitude hydrothermal system
Source: Frontiers journal article supplement (doi:10.3389/fmicb.2024.1477458), 2024-09-30
Supplement: Data_Sheet_2.PDF [file Data_Sheet_2.PDF]

A)

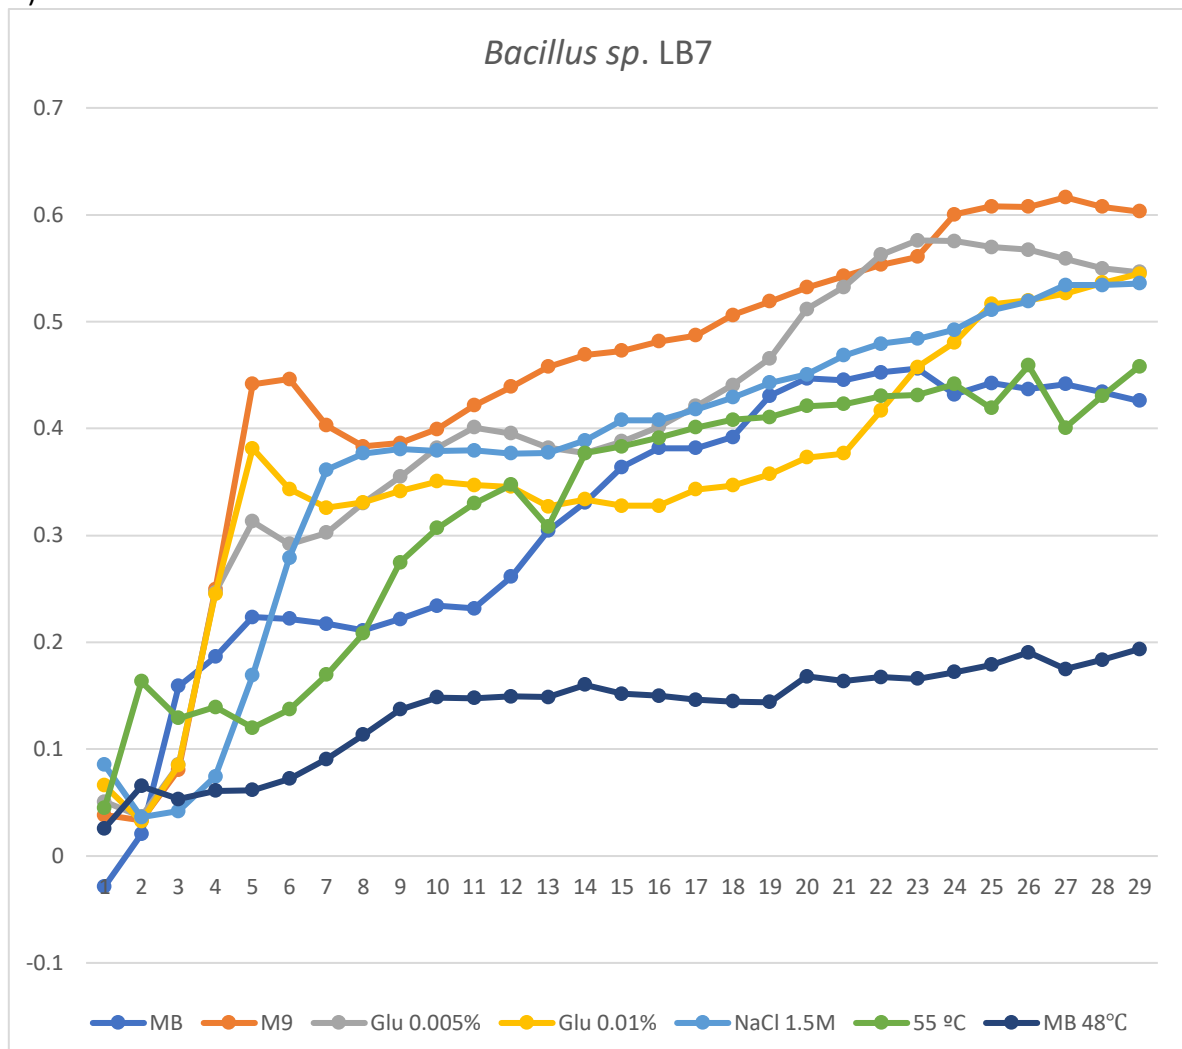

B)

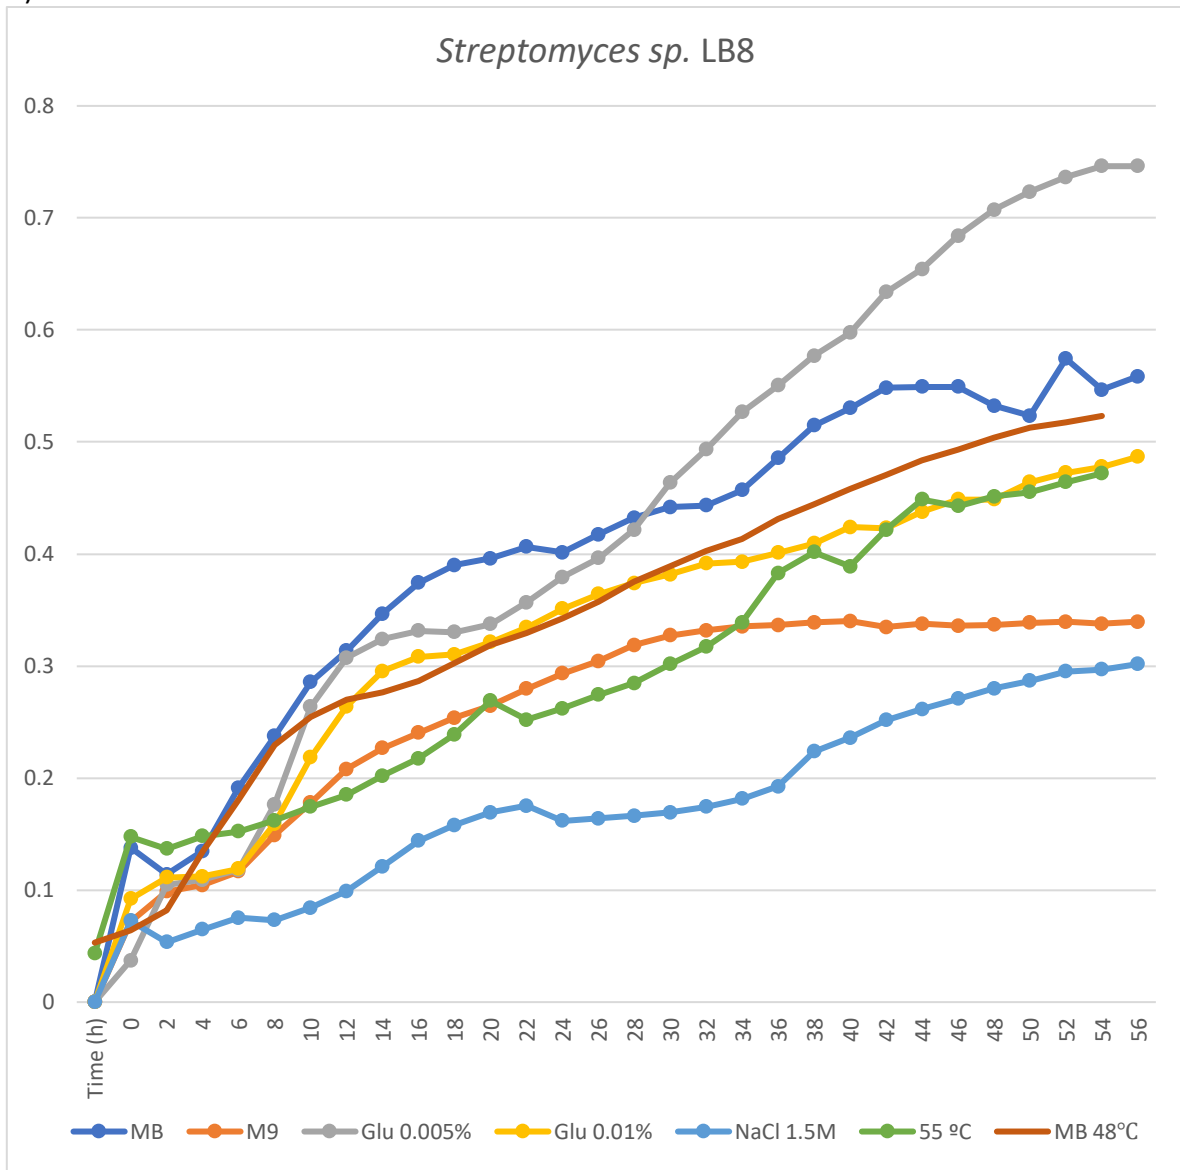

**Supplementary Figure S2.** Growth curve of LB7 and LB8 at different culture conditions. A) LB7 strain grown in M9 medium and MB, MB supplemented with Glucose 0.005% and 0.01%, NaCl 1.5 M and at 48 °C and 55 °C B) LB8 strain grown in M9 medium and MB, MB supplemented with Glucose 0.005% and 0.01%, NaCl 1.5 M, at 48 °C and at 55 °C. Curves show an average of 5 replicates.
