# Supplementary material for: Secondary metabolites with antimicrobial activity produced by thermophilic bacteria from a high-altitude hydrothermal system
Source: Frontiers journal article supplement (doi:10.3389/fmicb.2024.1477458), 2024-09-30
Supplement: Data_Sheet_4.PDF [file Data_Sheet_4.PDF]

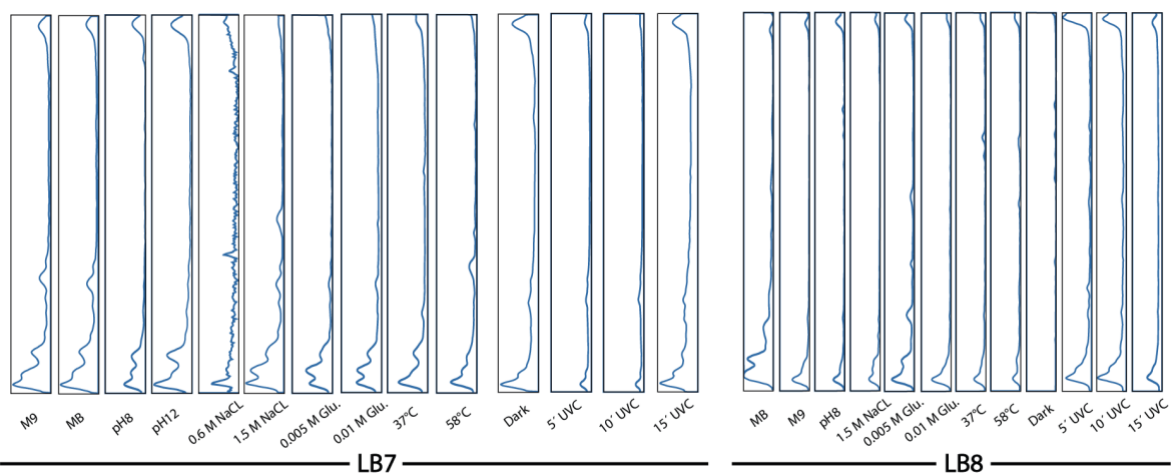

**Supplementary Figure S4.** Intensity plot representing the chromatograms band profile of the organic extract obtained from LB7 and LB8 strains. Each peak represents the corresponding band in the gel.
